# Supplementary material
Source: PubMed Central journal article supplement (PMC5815045)

## Supplementary Online Content

Amin AP, Bach RG, Caruso ML, Kennedy KF, Spertus JA. Association of variation in contrast volume with acute kidney injury in patients undergoing percutaneous coronary intervention. *JAMA Cardiol*. Published online July 5, 2017.

doi:10.1001/jamacardio.2017.2156

**eFigure 1.** Relationship Between Increasing Contrast Volume and AKI

**eFigure 2.** Correlation Between Physicians' Average Contrast Volume Used and Their Average Observed AKI Rate

This supplementary material has been provided by the authors to give readers additional information about their work.

**eFigure 1.** Relationship Between Increasing Contrast Volume and AKI

The bars represent the AKI rate associated with increasing contrast volume categories.

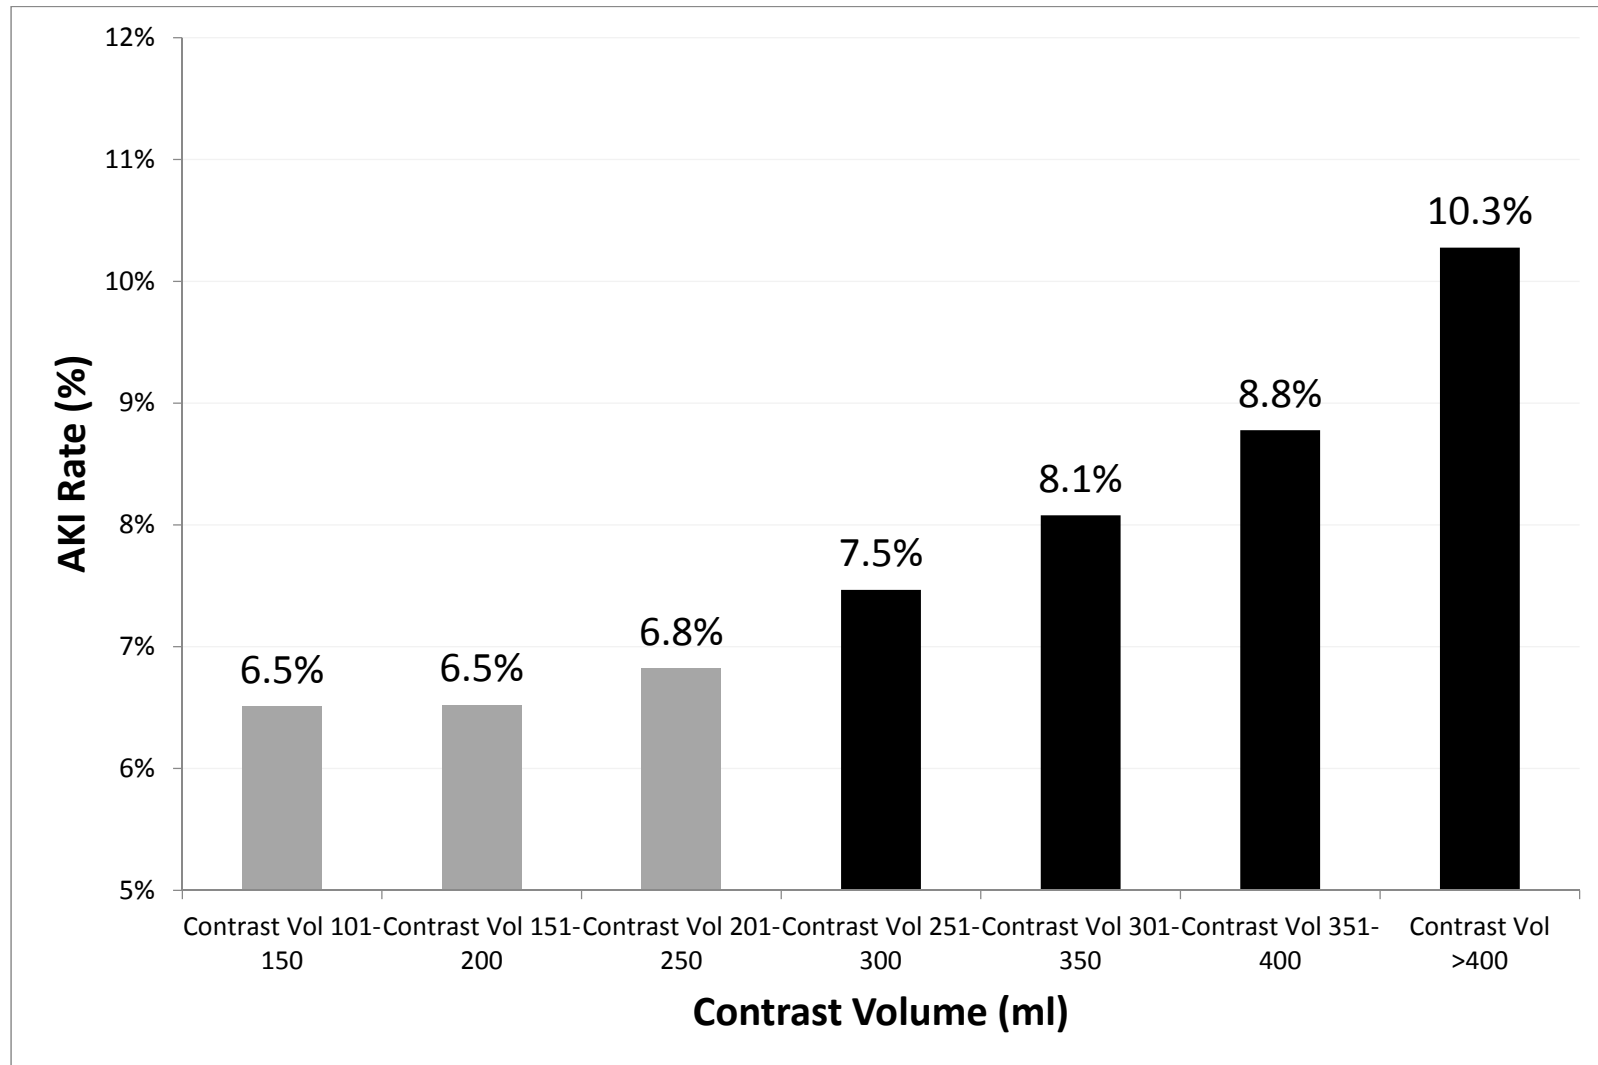

**eFigure 2.** Correlation Between Physicians' Average Contrast Volume Used and Their Average Observed AKI Rate

This is a scatterplot of the physicians' average contrast volume used on the Y-axis and their average observed AKI rate on the X-axis.

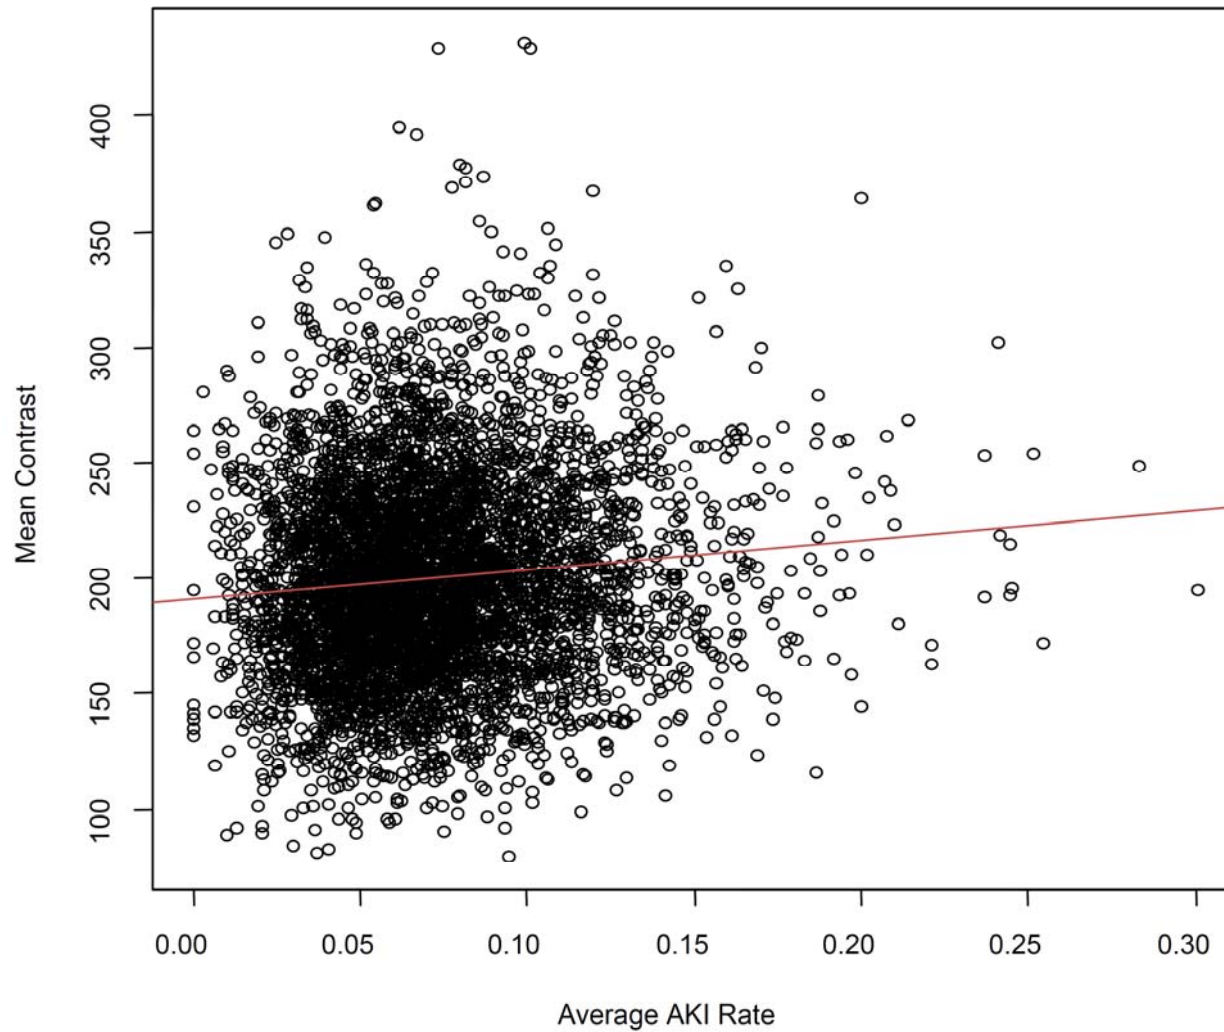

Supplement: jamacardiol-2-1007-s001.pdf [file jamacardiol-2-1007-s001.pdf]
